# Psychiatric Services

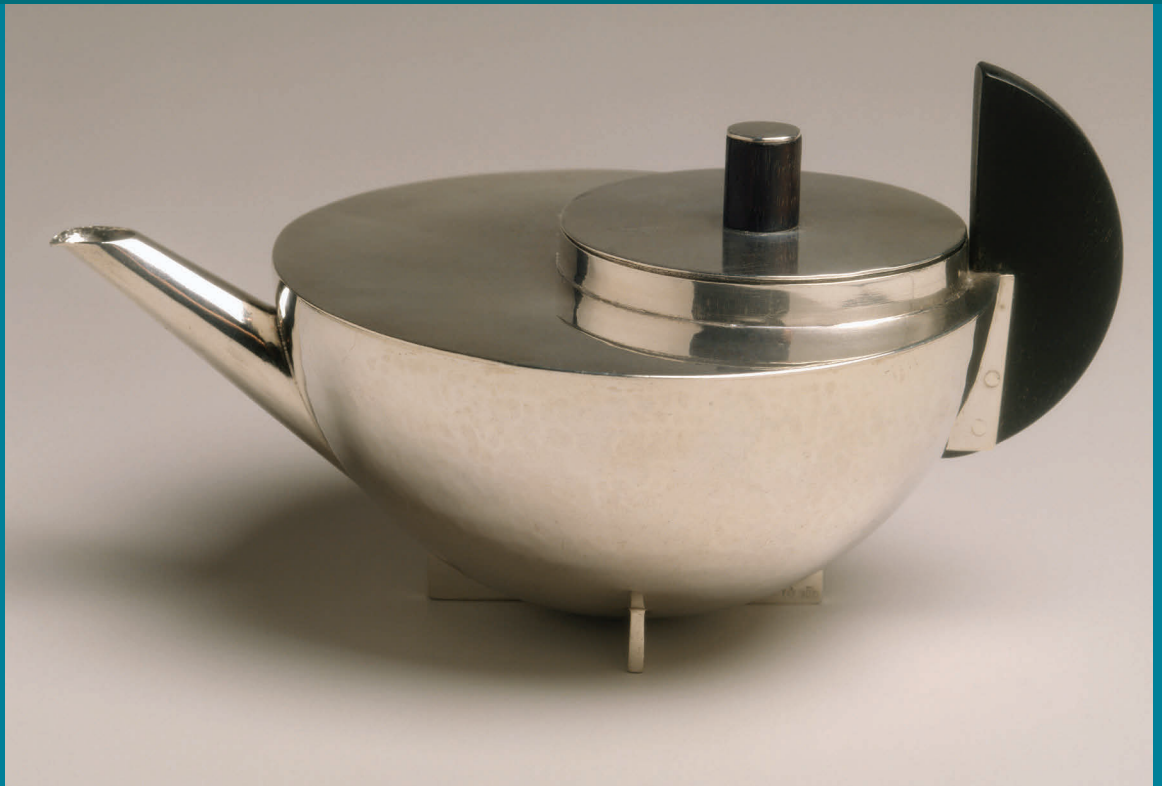

Health homes for people with serious mental illness: outcomes in California  
Housing First and criminal justice involvement: housing configuration matters  
Employment and lower hospitalization risk in the Mental Health Treatment Study  
Reducing lethal encounters: the need to move beyond CIT training for police
