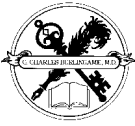

## Call for Nominations

The Institute of Living/Hartford Hospital is pleased to announce that nominations are now being accepted for the 2017 C. Charles Burlingame Award. This award,

honoring an outstanding leader in psychiatric education, research or administration, is made in the memory of Dr. Burlingame, psychiatrist-in-chief from 1931 to 1950.

We invite you to nominate a person who has significantly advanced the field of psychiatry. The nomination must include a current curriculum vitae and two letters of support describing the candidate's achievements.

The Institute of Living is a comprehensive behavioral health system for the evaluation and treatment of psychiatric and addiction disorders. We offer a full continuum of services to patients and remain committed to the highest standards of clinical care, research and education.

### Past Recipients

- |                                       |                                   |
|---------------------------------------|-----------------------------------|
| 1988 Robert Kellner, M.D., Ph.D.      | 2003 Dilip V. Jeste, M.D.         |
| 1989 William T. Carpenter, Jr., M.D.  | 2004 David H. Barlow, Ph.D.       |
| 1990 Dennis P. Cantwell, M.D.         | 2005 Herbert D. Kleber, M.D.      |
| 1991 George E. Vaillant, M.D.         | 2006 Daniel N. Stern, M.D.        |
| 1992 A. John Rush, M.D.               | 2007 Jerrold F. Rosenbaum, M.D.   |
| 1993 John C. Nemiah, M.D.             | 2008 K. Ranga Rama Krishnan, M.D. |
| 1994 Maurice J. Martin, M.D.          | 2009 David J. Kupfer, M.D.        |
| 1995 Otto F. Kernberg, M.D.           | 2010 Professor Sir Michael Rutter |
| 1996 Charles P. O'Brien, M.D., Ph.D.  | 2011 Jeffrey A. Lieberman, M.D.   |
| 1997 Glen Owen Gabbard, M.D.          | 2012 Judith L. Rapoport, M.D.     |
| 1998 Lissy F. Jarvik, M.D., Ph.D.     | 2013 Nora D. Volkow, M.D.         |
| 1999 Nancy C. Andreasen, M.D., Ph.D.  | 2014 Daniel R. Weinberger, M.D.   |
| 2000 Lewis L. Judd, M.D.              | 2015 David A. Brent, M.D.         |
| 2001 Paul S. Appelbaum, M.D.          | 2016 Steven S. Sharfstein, M.D.   |
| 2002 Charles B. Nemeroff, M.D., Ph.D. |                                   |

**Institute  
of Living**

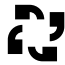

A Division of Hartford Hospital

Nominations should be sent no later than January 11, 2017 to:  
Harold I. Schwartz, M.D.  
HHC Regional VP, Behavioral Health  
Psychiatrist-in-Chief  
The Institute of Living/Hartford Hospital  
200 Retreat Ave., Hartford, CT 06106  
or e-mailed to  
Kathleen.Day@hhchealth.org

## UNMATCHED GROWTH OPPORTUNITIES

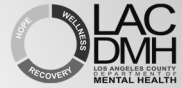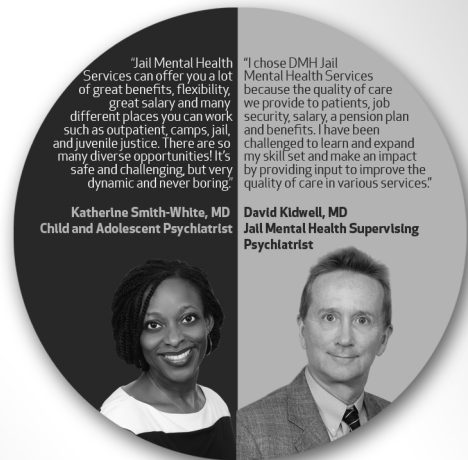

"Jail Mental Health Services can offer you a lot of great benefits, flexibility, great salary and many different places you can work such as outpatient, camps, jail, and juvenile justice. There are so many diverse opportunities! It's safe and challenging, but very dynamic and never boring."

**Katharine Smith-White, MD**  
Child and Adolescent Psychiatrist

"I chose DMH Jail Mental Health Services because the quality of care we provide to patients, job security, salary, a pension plan and benefits. I have been challenged to learn and expand my skill set and make an impact by providing input to improve the quality of care in various services."

**David Kidwell, MD**  
Jail Mental Health Supervising Psychiatrist

The Los Angeles County Department of Mental Health has immediate openings with Jail Mental Health Services, Juvenile Justice Correctional Facilities, Antelope Valley, and directly operated programs. This is your chance to join the leading mental health agency in the nation and work in a safe, diverse, and challenging environment. Our entire department is filled with opportunities for professional development and growth, and is expanding exponentially with 27 new full-time psychiatrist positions. We offer competitive salaries with potential bonuses up to \$30,000\* a year, depending on qualifications and placement, plus up to 24 hours a week is allowed for outside employment.

\*Based on CEO approval at step 15 of the mental health psychiatrist salary schedule.

[www.psychiatristjobs.la](http://www.psychiatristjobs.la)

**Psychiatric Services** (ISSN |1075-2730; online version, 1557-9700) is published monthly by the American Psychiatric Association, editorial and executive office, 1000 Wilson Blvd., Suite 1825, Arlington, VA 22209-3901. Copyright © 2016 by the American Psychiatric Association. Printed in U.S.A. Periodicals postage paid at Arlington, VA, and at additional mailing offices. POSTMASTER: Send address changes to **Psychiatric Services, 1000 Wilson Blvd., Suite 1825, Arlington, VA 22209-3901.**

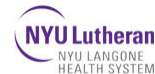

The NYU Lutheran Medical Center's Psychiatric Emergency Services Program, and the NYU Lutheran Inpatient Psychiatry Service, are actively recruiting well-trained, compassionate physicians who excel in patient management and quality improvement to join our team full time. The positions that are based in our psychiatric emergency room are for night and weekend coverage and the position that is based on our inpatient unit is for day time coverage. NYU Lutheran is a mission-driven, patient-centered, integrated community-based, academic medical center in Brooklyn.

In addition to being central to the Psychiatry Service, NYU Lutheran's psychiatrists play integral roles in education, quality improvement, hospital administration, transitions of care, patient safety, research, information technology and population health.

We offer competitive salaries, comprehensive benefits as well as academic support. Psychiatrists at NYU Lutheran are granted faculty appointments to NYU School of Medicine.

We invite you to learn more about our program and to apply for a position by sending your CV to:

**W. Gordon Frankle, MD, Chief, NYU Lutheran Psychiatry Service  
and Sean Pavlow, Administrative Director  
NYU Lutheran Psychiatry Service at [Sean.Pavlow@nyumc.org](mailto:Sean.Pavlow@nyumc.org)**

# New Titles on Geriatric Psychiatry

NEW!

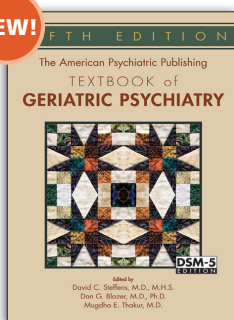

Available online at  
Psychiatryonline.org

## The American Psychiatric Publishing Textbook of Geriatric Psychiatry, Fifth Edition

*Edited by David C. Steffens, M.D., M.H.S., Dan G. Blazer, M.D., Ph.D., and Mugdha E. Thakur, M.D.*

This Fifth Edition is an indispensable resource for psychiatric clinicians and trainees charged with assessing, diagnosing, and treating mental disorders in our nation's burgeoning population of older adults, as well as the nurses and other professionals who provide critically important care day to day. Building on the prodigious strengths of previous editions, this revision is the most current, comprehensive, and systematic textbook of geriatric psychiatry available today, and the only one that is DSM-5® concordant.

Widely recognized as the standard in its field, the book serves a critical need for clinicians challenged to meet the mental health needs of an aging population.

2015 • 837 pages • ISBN 978-1-58562-484-3 • Hardcover • \$187.00 • Item #62484

2015 • 837 pages • ISBN 978-1-58562-522-2 • eBook • \$150.00 • Item #62522

2015 • 12 Month Subscription • Online at Psychiatryonline.org • \$155.00 • Item #537005

NEW!

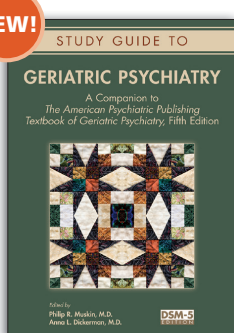

## Study Guide to Geriatric Psychiatry

**A Companion to The American Psychiatric Publishing Textbook of Geriatric Psychiatry, Fifth Edition**

*Philip R. Muskin, M.D., and Anna L. Dickerman, M.D.*

*Study Guide to Geriatric Psychiatry* is a question-and-answer companion that allows you to evaluate your mastery of the subject matter as you progress through *The American Psychiatric Publishing Textbook of Geriatric Psychiatry*, Fifth Edition. The *Study Guide* is made up of approximately 255 questions divided into 25 individual quizzes that correspond to chapters in the textbook. Questions are followed by an answer guide that references relevant text in the textbook. Each answer is accompanied by a discussion that not only addresses the correct response but also explains why other responses are not correct.

2017 • 352 pages • ISBN 978-1-61537-045-0 • Paperback • \$62.00 • Item #37045

2017 • 352 pages • ISBN 978-1-61537-106-8 • eBook • \$50.00 • Item #37106

NEW!

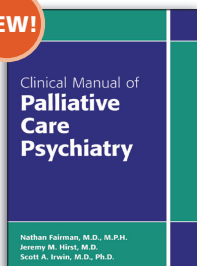

## Clinical Manual of Palliative Care Psychiatry

*Nathan Fairman, M.D., M.P.H., Jeremy M. Hirst, M.D., and Scott A. Irwin, M.D., Ph.D.*

The book seeks to bridge the gulf between principles and practice for two groups of clinicians: front-line palliative care providers with little mental health training and mental health specialists who may lack familiarity with palliative care practice. The book reviews palliative care principles and practice models, treatment of the psychiatric symptoms most commonly encountered in palliative care settings.

2016 • 297 pages • ISBN 978-1-58562-476-8 Paperback • \$59.00 • Item #62476

2016 • 297 pages • ISBN 978-1-61537-061-0 • eBook • \$47.00 • Item #37061

NEW!

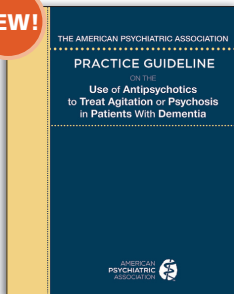

COMING  
DECEMBER 2016!

## The American Psychiatric Association Practice Guideline on the Use of Antipsychotics to Treat Agitation or Psychosis in Patients With Dementia

*American Psychiatric Association*

The guideline offers clear, concise, and actionable recommendation statements to help clinicians to incorporate recommendations into clinical practice, with the goal of improving quality of care. Each recommendation is given a rating that reflects the level of confidence that potential benefits of an intervention outweigh potential harms.

2016 • 218 pages • ISBN 978-0-89042-677-7 • Paperback • \$65.00 • Item #2677

2016 • 218 pages • ISBN 978-0-89042-678-4 • eBook • \$52.00 • Item #2678

## DSM-5® Pocket Guide for Elder Mental Health

*Sophia Wang, M.D., and Abraham M. Nussbaum, M.D., FAPA*

2017 • 375 pages • ISBN 978-1-61537-056-6 • Paperback • \$65.00 • Item #37056

2017 • 375 pages • ISBN 978-1-61537-119-8 • eBook • \$52.00 • Item #37119
