# Essential New Titles on Addiction Psychiatry

NEW!

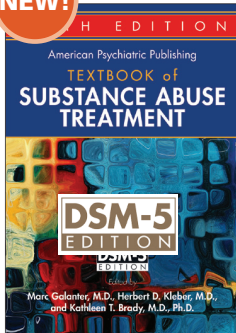

## The American Psychiatric Publishing Textbook of Substance Abuse Treatment

*Edited by Marc Galanter, M.D., Herbert D. Kleber, M.D., and Kathleen T. Brady, M.D., Ph.D.*

No other text available today offers what *The American Psychiatric Publishing Textbook of Substance Abuse Treatment* can: completely updated treatment information on a broad range of substance use disorders that is consistent with the new DSM-5 classification and thus reflective of how psychiatry is practiced today. Designed for researchers and mental health professionals ranging from trainee to licensed practitioner, the book is also appropriate for a diverse array of rehabilitation settings, from inpatient to community-based treatment. Full coverage is provided on 12-step programs, as well, including the latest outcomes research.

2015 • 980 pages • ISBN 978-1-58562-472-0 • Hardcover • \$204.00 • Item #62472

2015 • 980 pages • ISBN 978-1-58562-518-5 • eBook • \$163.00 • Item #62518

2015 • 980 pages • ISBN 978-1-61537-003-0 • Online at [Psychiatryonline.org](http://Psychiatryonline.org) • \$174.00 • Item #537003

NEW!

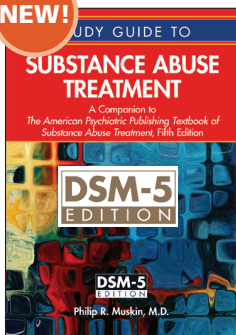

## Study Guide to Substance Abuse Treatment

### A Companion to The American Psychiatric Publishing Textbook of Substance Abuse Treatment, Fifth Edition

*Philip R. Muskin, M.D.*

*Study Guide to Substance Abuse Treatment* is a question-and-answer companion that allows you to evaluate your mastery of the subject matter as you progress through *The American Psychiatric Publishing Textbook of Substance Abuse Treatment, Fifth Edition*. The *Study Guide* is made up of questions divided into individual quizzes of 10-20 questions each that correspond to the chapters in the Textbook. Questions are followed by an Answer Guide that references relevant text in the Textbook to allow quick access to needed information. Each answer is accompanied by a discussion that addresses the correct response.

2016 • 419 pages • ISBN 978-1-58562-511-6 • Paperback • \$59.00 • Item #62511

2016 • 419 pages • ISBN 978-1-61537-025-2 • eBook • \$47.00 • Item #37025

## The Behavioral Addictions

*Edited by Michael S. Ascher, M.D., and Petros Levounis, M.D., M.A.*

2015 • 235 pages • ISBN 978-1-58562-485-0  
Paperback • \$62.00 • Item #62485

2015 • 235 pages • ISBN 978-1-58562-549-9  
eBook • \$49.95 • Item #62549

NEW!

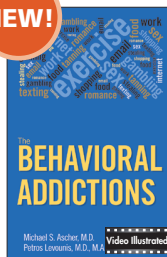

## Marijuana and Mental Health

*Edited by Michael T. Compton, M.D., M.P.H.*

2016 • 272 pages • ISBN 978-1-61537-008-5  
Paperback • \$59.00 • Item #37008

2016 • 272 pages • ISBN 978-1-61537-065-8  
eBook • \$47.00 • Item #37065

NEW!

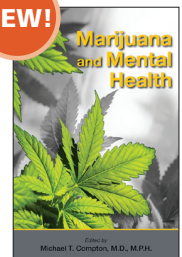

## Youth Substance Abuse and Co-occurring Disorders

*Edited by Yifrah Kaminer, M.D., M.B.A.*

2016 • 386 pages • ISBN 978-1-58562-497-3  
Paperback • \$65.00 • Item #62497

2016 • 386 pages • ISBN 978-1-61537-022-1  
eBook • \$52.00 • Item #37022

NEW!

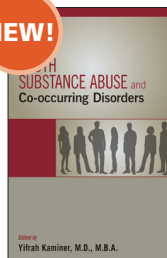

## Pocket Guide to Addiction Assessment and Treatment

*Edited by Petros Levounis, M.D., M.A., Erin Zerbo, M.D., and Rashmi Aggarwal, M.D.*

2016 • 379 pages • ISBN 978-1-58562-512-3  
Paperback • \$65.00 • Item #62512

2016 • 379 pages • ISBN 978-1-61537-072-6  
eBook • \$52.00 • Item #37072

NEW!

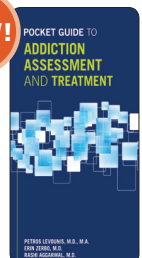

AMERICAN  
PSYCHIATRIC  
ASSOCIATION  
PUBLISHING

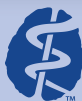

[www.appi.org](http://www.appi.org)

Email: [appi@psych.org](mailto:appi@psych.org)

Toll Free: 1-800-368-5777

20% Discount for American Psychiatric Association Members

25% Discount for APA Resident-Fellow Members

Please use Priority Code AH1644 when ordering.
